# Supplementary material for: Neuronal baseline shifts underlying boundary setting during free recall
Source: PubMed Central journal article supplement (PMC5670232; doi:10.1038/s41467-017-01184-1), 2017-11-03
Supplement: 41467_2017_1184_MOESM1_ESM.pdf [file 41467_2017_1184_MOESM1_ESM.pdf]

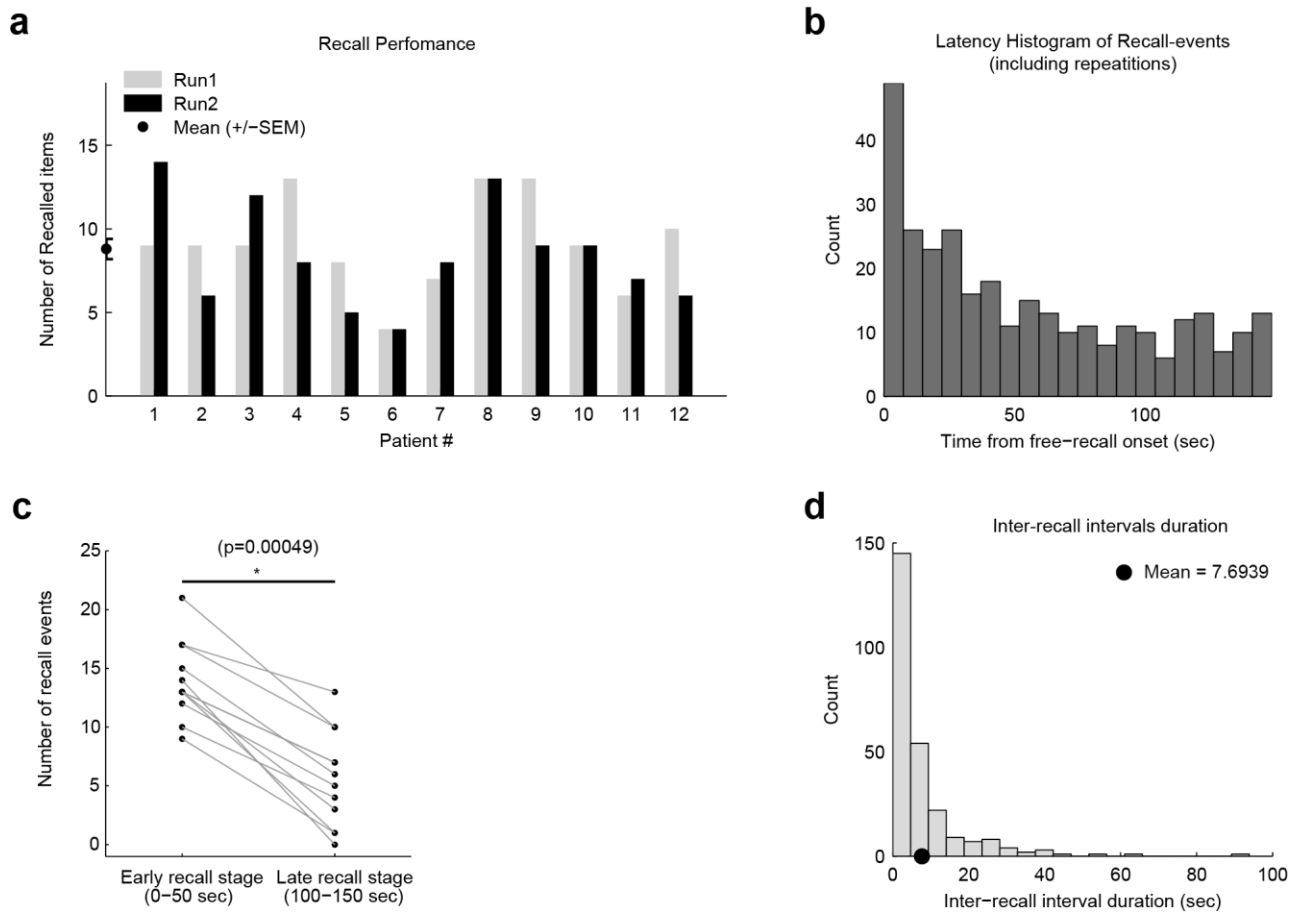

**Supplementary Figure 1. Behavioral performance.**

**(a)** Number of recalled items per run in each patient (excluding repetitions). Mean (+/- SEM): 8.79 ( $\pm 0.6$ ) items. Recall performance did not differ between the two runs ( $p > 0.42$ , Wilcoxon signed rank test). **(b)** Time histogram showing the distribution of onsets of individual recall events (as reported verbally by the patients) during the free recall period. Note the gradual decrease in recall events over time. **(c)** Early recall stages contained significantly more recall events than late recall stages ( $*p = 0.0005$ ,  $n = 12$  patients, Wilcoxon signed rank test). **(d)** Histogram of inter-recall intervals, showing a right skewed distribution with fairly long inter-recall intervals (mean: 7.69 sec).

**a**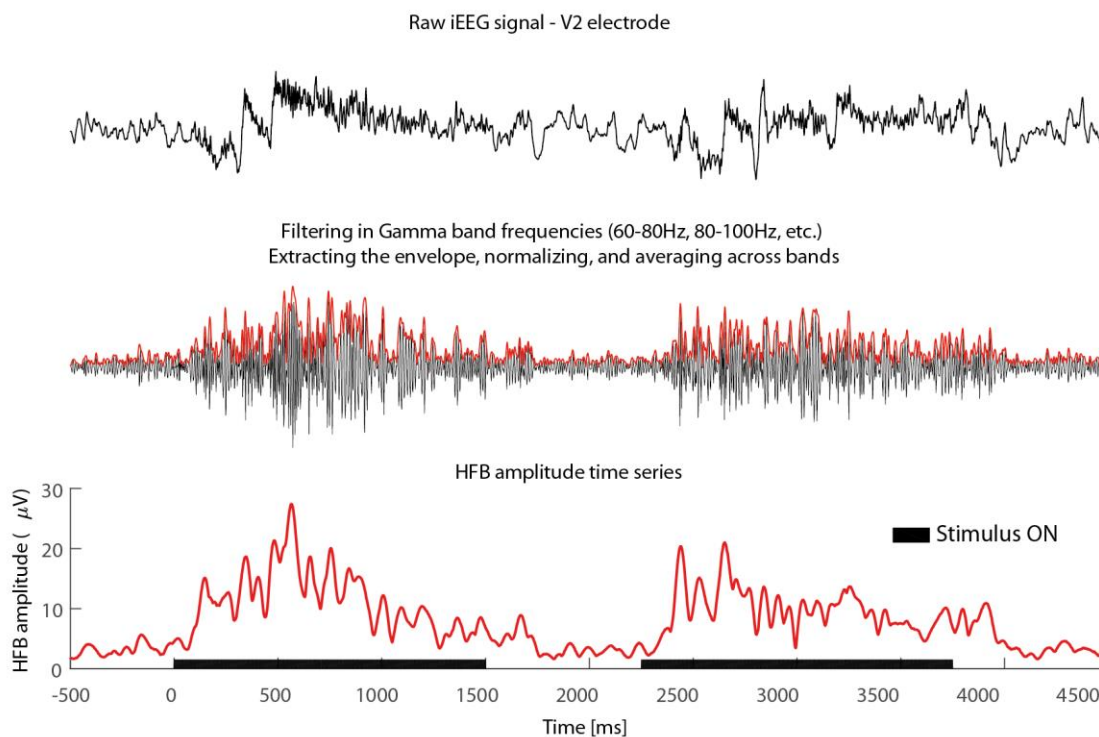**b**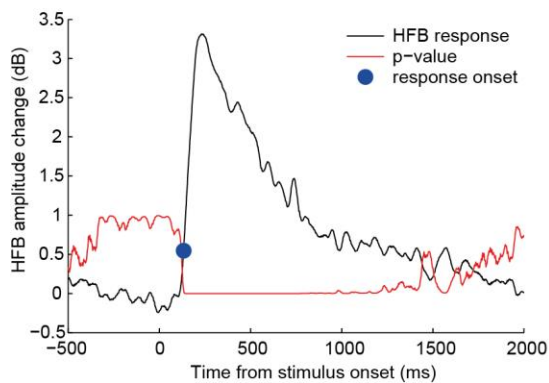**c**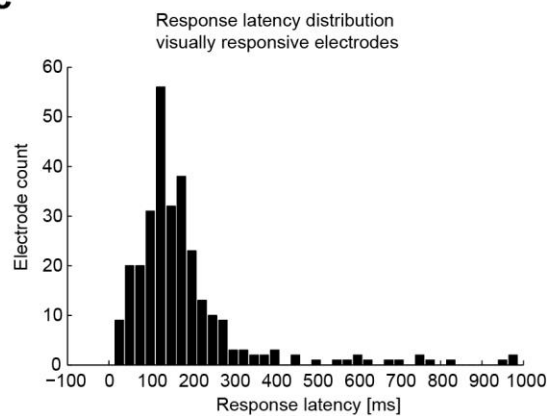

**Supplementary Figure 2. HFB signal processing pipeline, an example of HFB stimulus response and distribution of response onsets across visually responsive electrodes.**

**(a)** Top trace: raw ECoG signal during the presentation of two images. Note the high frequency activity that begins shortly after stimulus onset. Middle trace: the same ECoG signal filtered between 60-80 Hz. The envelope of the narrow-band signal (red line) was extracted by taking the absolute value of the analytic signal (obtained using a Hilbert transform). A similar procedure was done for other bands in the high-gamma range (60-80 Hz, 80-100 Hz, 100-120 Hz, etc.). The envelope of each band was normalized and then averaged across all bands to produce one HFB time series, which reflects mean neuronal population activity. **(b)** Mean HFB response to images ( $n=112$ ) in one representative visually responsive electrode. Response latency was defined as the first time point in which the HFB amplitude crossed a p-value of 0.05 and remained significant for at least 50 ms. **(c)** Distribution of response latency across all visually responsive electrodes (see Supplementary Table 2 for further details).

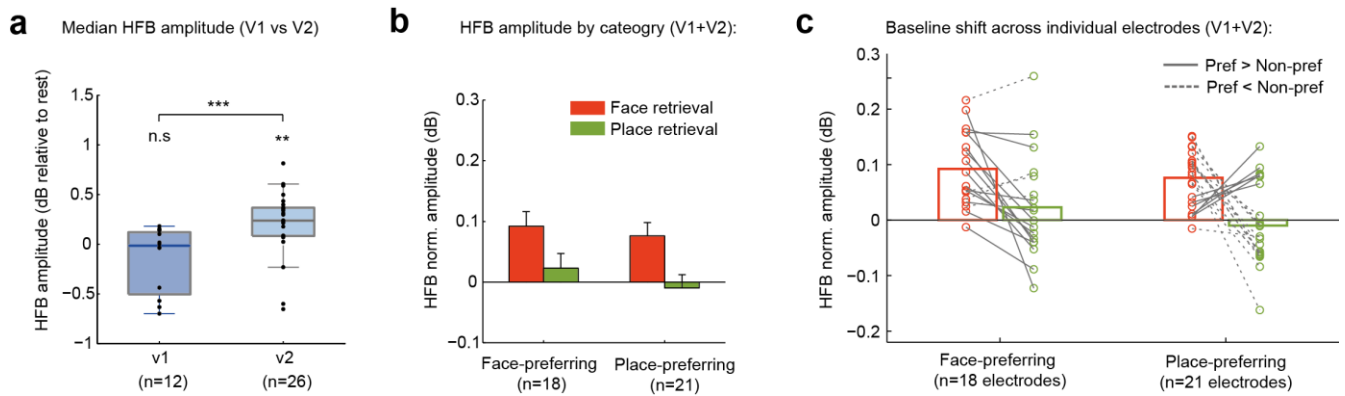

**Supplementary Figure 3. HFB activity in areas V1 and V2 during the free recall period.**

**(a)** During the free recall period electrodes in V2 showed a significant increase in median HFB amplitude relative to resting-state (\*\* $p=0.0017$ , Wilcoxon signed rank test). V1 electrode did not show this effect ( $p=0.46$ , Wilcoxon signed rank test). Directly comparing the two groups of electrodes using a Wilcoxon rank sum test revealed a significant difference (\*\* $p<0.001$ ; whiskers are 1.5 the interquartile range). **(b-c)** Early visual electrodes showed a significant difference in activity levels during the free recall period between the two categories. To check if those baseline modulations were linked to the category preference of these electrodes during viewing, we split V1 and V2 electrodes into two groups based on their category preference during viewing (face/place preference), and compared the median amplitudes during faces/places retrieval across the two groups in a two-way mixed-effects ANOVA (similar to the analysis presented in figure 3a). We did not find any relation between category preference during viewing and baseline modulation during free recall in these electrode (i.e. no interaction between 'category-preference' and 'recalled-category':  $F(1,37)=0.26$ ,  $p>0.6$ ). Regardless of category preference during viewing, we found an intriguing overall increase in HFB amplitude during recall of faces compared to places ( $F(1,37)=22.76$ ,  $p<0.0001$ ). Error bars represent SEM.

**a** Category Selective Electrodes - Order Effect:

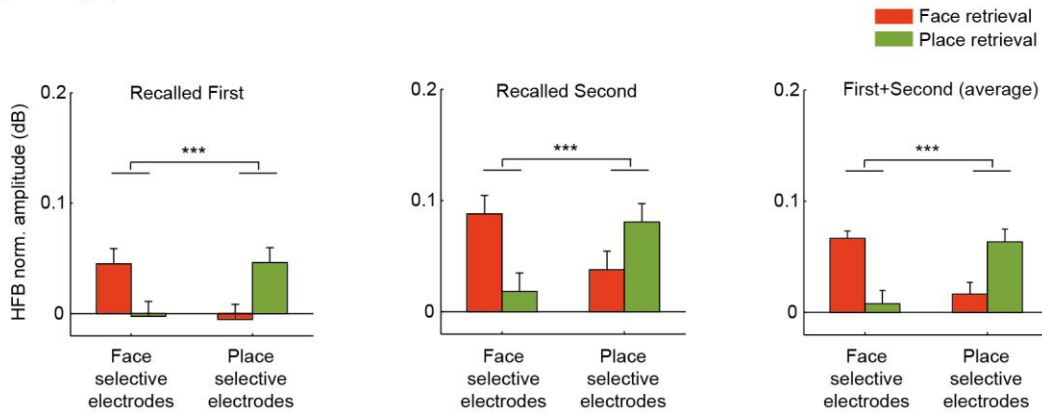

**b** Baseline shift across individual electrodes (category selective):

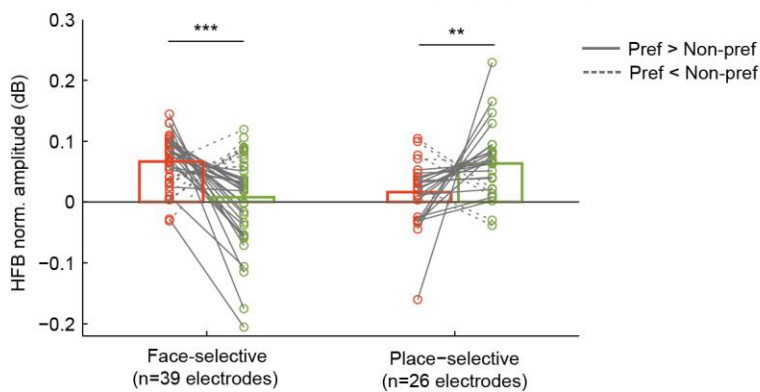

**Supplementary Figure 4. Three-way mixed-design ANOVA for testing recall order effects.**

**(a)** A mixed-design ANOVA using the fixed factors of 'electrode group', 'recalled category' and 'recall order', and the random factors of 'patient' and 'electrode' revealed in addition to an interaction between recalled category and electrode group, a significant recall order effect ( $F(1,189)=11.10, ***p=0.001$ ). A direct comparison between the two levels of recall-order (targeted first vs. targeted second) revealed an overall increase in HFB activity for both preferred and non-preferred categories when targeted second, that is, after the opposed category was already retrieved ( $t(189)=-3.33, p<0.01$ ). This result is likely to reflect an increase in cognitive demands linked to the second retrieval, which is more challenging due to the temporal distance from the encoding phase and the top-down control efforts needed in order to ignore recently-retrieved items from the opposed category. **(b)** A spaghetti plot showing within electrode amplitude differences during recall, contrasting preferred and non-preferred categories (face-selective electrodes:  $t(189)=4.38, ***p<0.0001$ ; place-selective electrodes:  $t(189)=-2.87, **p<0.01$ ; pairwise comparisons using a mixed-effects model).

**a** Mean HFB response per image:

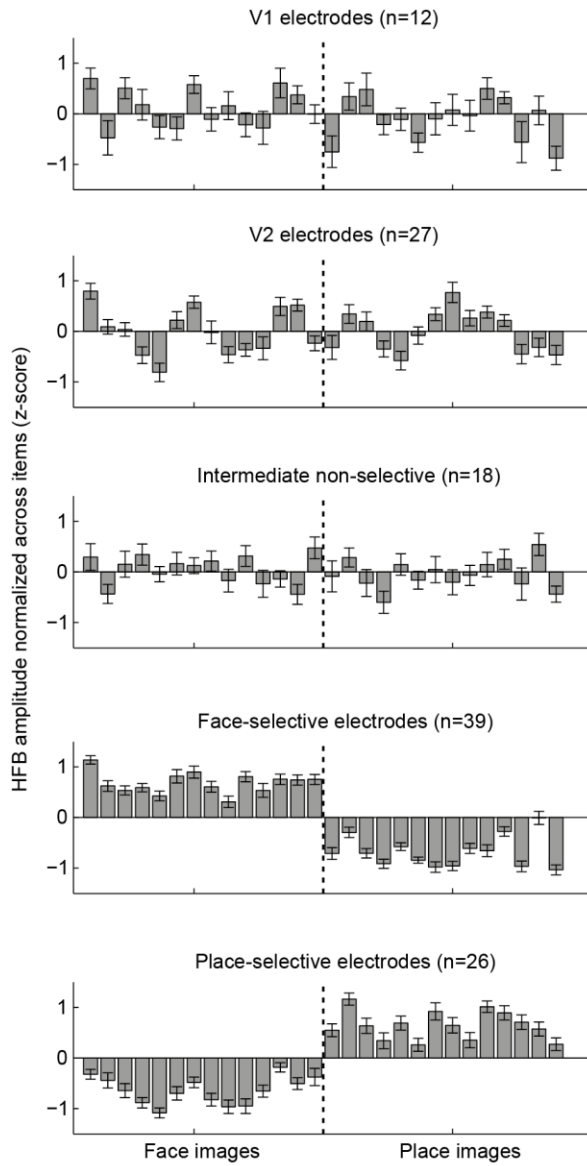

**b** Distribution of "preferred" images:

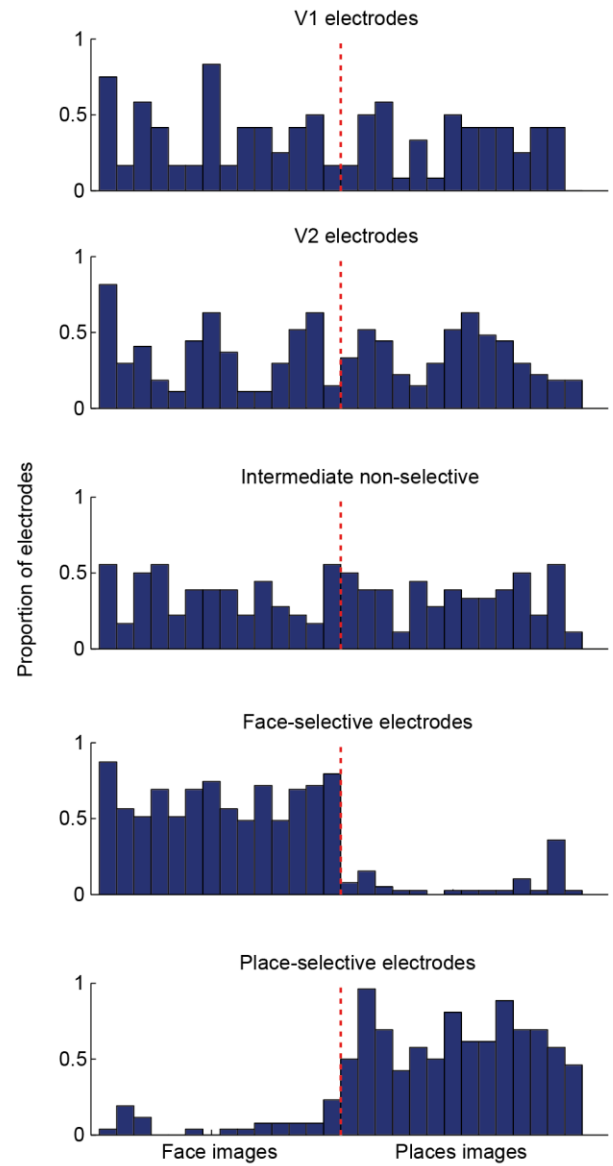

**c**

Individual electrodes' recall response:

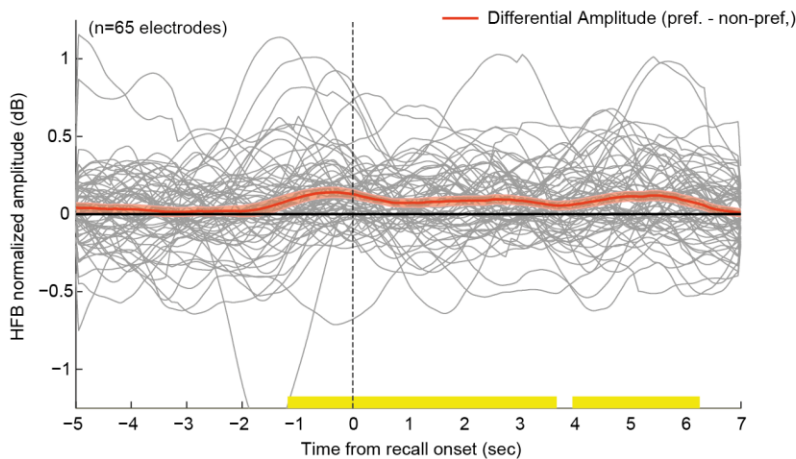

**Supplementary Figure 5. Mean HFB response per image, distribution of preferred items across different electrode groups, and individual electrodes' response to recall events.**

**(a)** HFB response to the presentation of each item was averaged in a time window of 100 to 500 ms post stimulus, normalized into z-score and grand-averaged across all electrodes within each electrode group. **(b)** Distribution of items defined as “preferred” (top ten responses) across the two categories. As can be seen, V1 and V2 did not show category preference, but did manifest a considerable amount of variability in the response to different exemplars. **(c)** Recall-related differential activity (preferred–non-preferred images) in individual category selective electrodes. Shaded areas represent SEM.

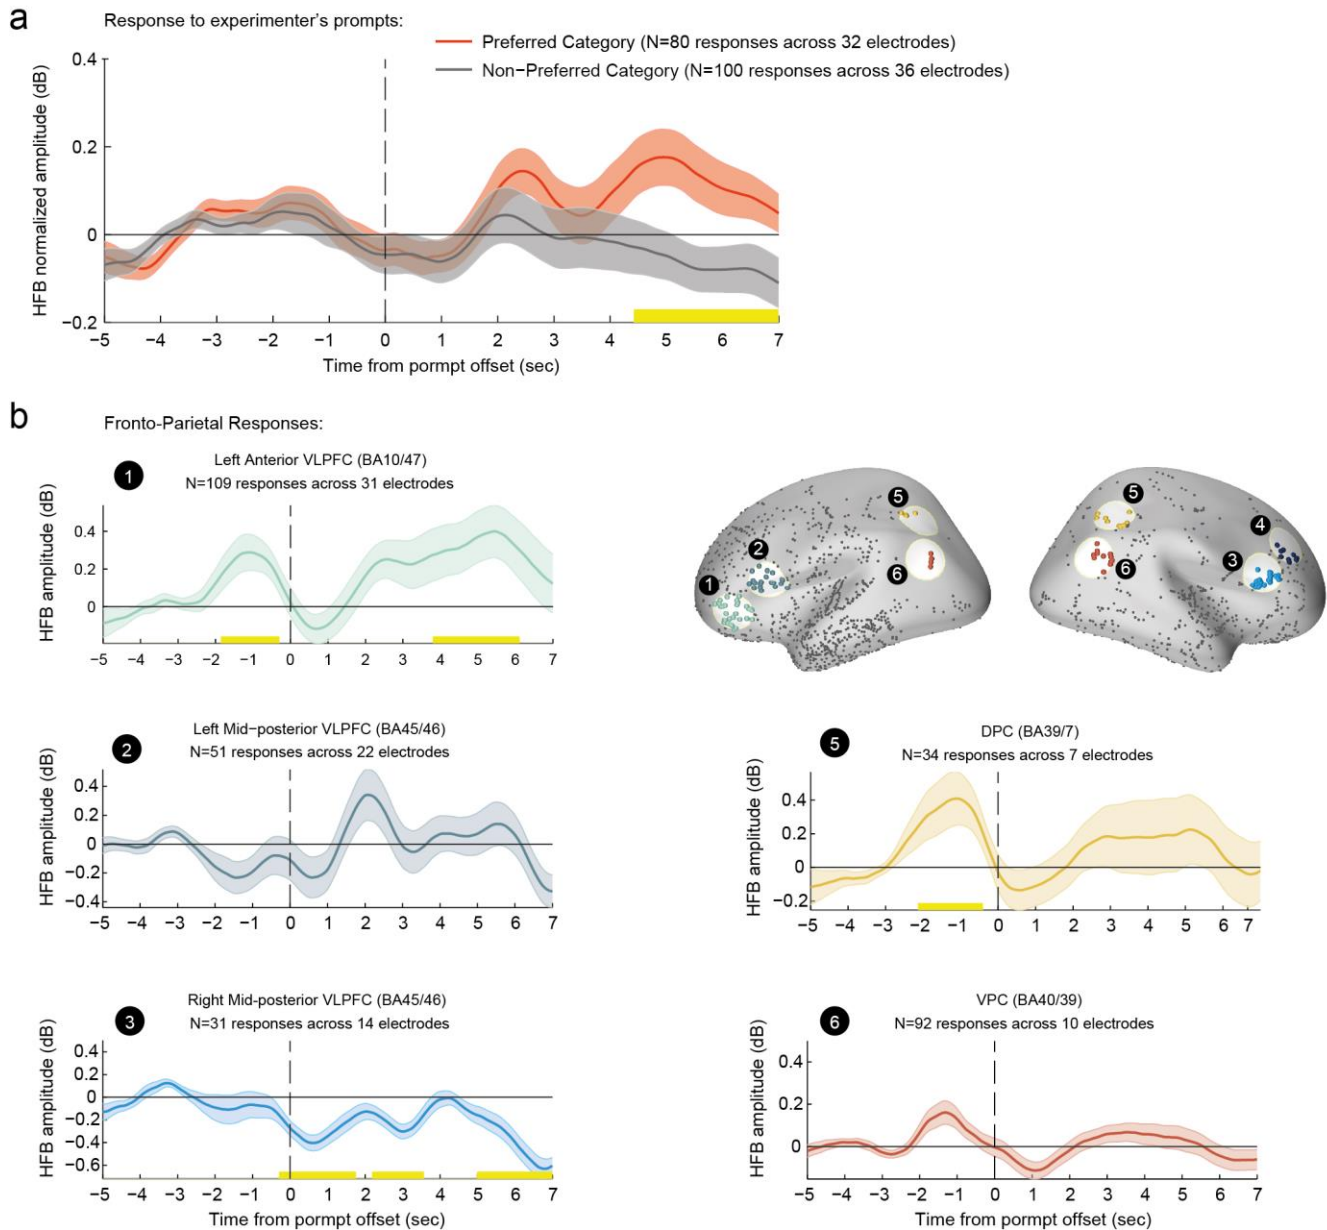

**Supplementary Figure 6. Baseline shift recovery following an experimenter's prompt.**

(a) HFB response to experimenter's prompts during preferred category recall (red) and non-preferred category recall (gray). Before the prompt is given there were no substantial differences between preferred and non-preferred categories. Following the prompt the baseline shift was recovered and the two signals became significantly different, with higher activity when targeting the preferred category. (b) HFB response to experimenter's prompts in prefrontal and parietal regions of interest. Note the significant amplitude increase in left aVLPFC and DPC. Electrodes in the DLPFC were not included in this analysis due to an insufficient number of trials. Yellow marks indicate significant time bins ( $p < 0.05$ , cluster-based correction). Shaded areas represent SEM. Abbreviations: aVLPFC – anterior ventrolateral prefrontal cortex (~BA10/47); mid-VLPFC – mid-posterior ventrolateral prefrontal cortex (~BA45); DLPFC – dorsolateral prefrontal cortex (~BA8/9); DPC – dorsal parietal cortex (~BA39/7); VPC – ventral parietal cortex (~BA39/40).

Ultra slow HFB fluctuations (0.01-1 HZ) during recall of preferred vs. non-preferred category  
Category Selective Electrodes (n=65)

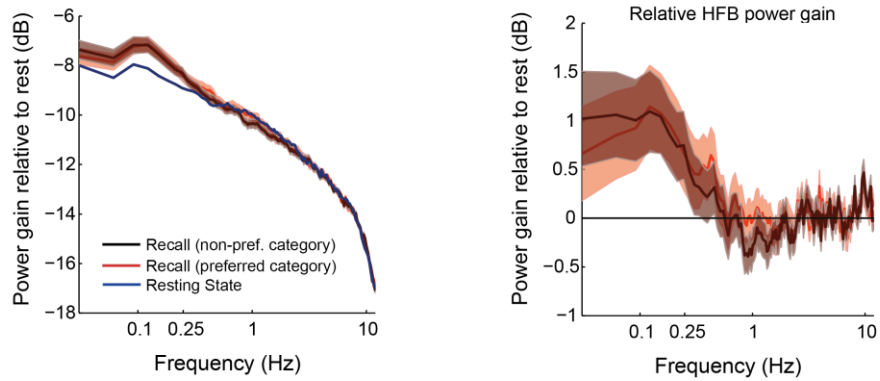

**Supplementary Figure 7. Spectral analyses of ultra-slow HFB activity fluctuations (<1Hz).**

Spectral analysis of HFB signals in category selective electrodes during recall of preferred vs. non-preferred category did not reveal any significant differences ( $p > 0.05$ , FDR corrected, signed rank tests). Shaded areas represent SEM.



Raw ECoG spectra (1-50 Hz) - Category Selective Electrodes (n=65):

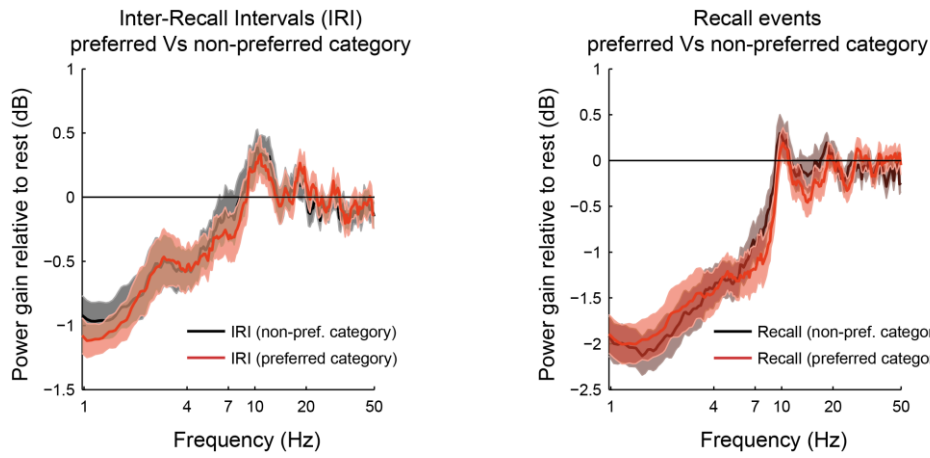

**Supplementary Figure 8. Spectral analyses of raw ECoG signals (1-50Hz) in category selective electrodes during free recall of images from the preferred vs the non-preferred category.**

Spectral analysis of raw ECoG signals in category selective electrodes during recall of preferred vs. non-preferred category did not reveal any significant differences ( $p > 0.05$ , FDR corrected, signed rank tests). Shaded areas represent SEM.

| Patient #    | Sex | Age | Blindfold During Recall | Total analyzed electrodes | Visually responsive electrodes | Number of visually responsive electrodes in each ROI |           |                            |                |                 |
|--------------|-----|-----|-------------------------|---------------------------|--------------------------------|------------------------------------------------------|-----------|----------------------------|----------------|-----------------|
|              |     |     |                         |                           |                                | Retinotopic Areas                                    |           |                            | High-Order     |                 |
|              |     |     |                         |                           |                                | V1                                                   | V2        | Intermediate non-selective | Face Selective | Place Selective |
| 1            | M   | 28  | Closed eyes             | 126                       | 29                             | 0                                                    | 4         | 3                          | 8              | 2               |
| 2            | M   | 50  | Closed eyes             | 91                        | 30                             | 4                                                    | 1         | 9                          | 0              | 0               |
| 3            | M   | 38  | ✓                       | 83                        | 16                             | 0                                                    | 0         | 0                          | 1              | 3               |
| 4            | M   | 23  | ✓                       | 159                       | 59                             | 0                                                    | 13        | 0                          | 10             | 5               |
| 5            | F   | 44  | ✓                       | 150                       | 19                             | 0                                                    | 4         | 1                          | 4              | 1               |
| 6            | F   | 29  | ✓                       | 102                       | 34                             | 4                                                    | 4         | 4                          | 5              | 0               |
| 7            | F   | 22  | ✓                       | 225                       | 8                              | 0                                                    | 0         | 0                          | 0              | 0               |
| 8            | F   | 34  | ✓                       | 135                       | 27                             | 4                                                    | 0         | 1                          | 4              | 3               |
| 9            | F   | 30  | ✓                       | 188                       | 14                             | 0                                                    | 0         | 0                          | 4              | 5               |
| 10           | F   | 29  | ✓                       | 251                       | 35                             | 0                                                    | 0         | 0                          | 2              | 7               |
| 11           | F   | 32  | ✓                       | 238                       | 4                              | 0                                                    | 0         | 0                          | 0              | 0               |
| 12           | F   | 55  | ✓                       | 251                       | 10                             | 0                                                    | 1         | 0                          | 1              | 0               |
| <b>Total</b> |     |     |                         | <b>1999</b>               | <b>280</b>                     | <b>12</b>                                            | <b>27</b> | <b>18</b>                  | <b>39</b>      | <b>26</b>       |

**Supplementary Table 1. Details of patients and distribution of visually responsive electrodes across individuals.**

| Patient | Channel | Electrode | MNI Coordinates |     |     | Vis. Response   | Cat. Selectivity | Response Latency |
|---------|---------|-----------|-----------------|-----|-----|-----------------|------------------|------------------|
| ID      | label   | group     | X               | Y   | Z   | effect size (d) | effect size (d)  | (ms)             |
| 1       | LGRD58  | Faces     | -45             | -83 | 0   | 2.65            | 1.17             | 58               |
| 1       | LGRD59  | Faces     | -38             | -83 | -6  | 1.88            | 1.61             | 70               |
| 1       | LGRD52  | Faces     | -51             | -56 | -6  | 1.69            | 1.27             | 82               |
| 1       | LTp4    | Faces     | -17             | -40 | -14 | 1.25            | 1.55             | 122              |
| 1       | LGRD60  | Faces     | -33             | -80 | -11 | 1.14            | 4.65             | 98               |
| 1       | LTo6    | Faces     | -35             | -49 | -24 | 0.93            | 3.65             | 134              |
| 1       | LGRD61  | Faces     | -64             | -55 | -13 | 0.61            | 1.25             | 126              |
| 1       | LTo7    | Faces     | -25             | -38 | -22 | 0.38            | 1.57             | 190              |
| 3       | LTIp6   | Faces     | -42             | -48 | -16 | 0.80            | 1.59             | 106              |
| 4       | RTp11   | Faces     | 49              | -58 | -4  | 1.53            | 1.94             | 132              |
| 4       | RTo15   | Faces     | 61              | -54 | -13 | 1.26            | 0.71             | 32               |
| 4       | RP4     | Faces     | 18              | -63 | 33  | 1.21            | 0.72             | 130              |
| 4       | RTp10   | Faces     | 49              | -72 | -5  | 1.12            | 1.30             | 118              |
| 4       | RFa13   | Faces     | 51              | 29  | 23  | 0.92            | 0.68             | 130              |
| 4       | RP2     | Faces     | 3               | -72 | 27  | 0.72            | 0.95             | 138              |
| 4       | RO12    | Faces     | 48              | -82 | -4  | 0.65            | 0.92             | 124              |
| 4       | RFo2    | Faces     | -7              | 24  | -27 | 0.50            | 0.60             | 208              |
| 4       | RTo14   | Faces     | 60              | -59 | -7  | 0.41            | 0.65             | 80               |
| 4       | RFo5    | Faces     | 9               | 25  | -25 | 0.33            | 0.62             | 202              |
| 5       | Lo8     | Faces     | -50             | -75 | 4   | 1.44            | 1.69             | 96               |
| 5       | Lo9     | Faces     | -50             | -74 | 7   | 0.88            | 0.90             | 110              |
| 5       | Lo10    | Faces     | -49             | -78 | 16  | 0.55            | 0.61             | 128              |
| 5       | LTIp4   | Faces     | -38             | -34 | -20 | 0.42            | 1.10             | 164              |
| 6       | RSOL5   | Faces     | 28              | -66 | -18 | 0.72            | 0.75             | 150              |
| 6       | RDTi1   | Faces     | 29              | -19 | -34 | 0.72            | 0.89             | 178              |
| 6       | Grid20  | Faces     | 45              | -70 | 14  | 0.59            | 0.88             | 154              |
| 6       | RDTi2   | Faces     | 33              | -31 | -29 | 0.48            | 0.61             | 182              |
| 6       | Grid12  | Faces     | 59              | -60 | 10  | 0.42            | 0.86             | 134              |
| 8       | RTo5    | Faces     | 44              | -50 | -17 | 1.35            | 0.94             | 70               |
| 8       | RTo6    | Faces     | 45              | -48 | -16 | 0.78            | 1.75             | 130              |
| 8       | RTp6    | Faces     | 54              | -25 | -20 | 0.53            | 1.35             | 176              |
| 8       | RTp5    | Faces     | 56              | -33 | -20 | 0.48            | 0.62             | 170              |
| 9       | LTO7    | Faces     | -57             | -49 | -25 | 1.14            | 2.77             | 118              |
| 9       | LTp5    | Faces     | -30             | -27 | -22 | 0.70            | 0.77             | 162              |
| 9       | Dh6     | Faces     | -40             | -25 | -20 | 0.58            | 1.06             | 182              |
| 9       | LTm4    | Faces     | -42             | -24 | -30 | 0.48            | 1.29             | 196              |
| 10      | LTp5    | Faces     | -40             | -48 | -19 | 0.89            | 0.91             | 136              |
| 10      | LTp6    | Faces     | -43             | -47 | -14 | 0.71            | 0.97             | 150              |
| 12      | LTm6    | Faces     | -41             | -50 | -24 | 0.45            | 2.11             | 170              |
| 1       | LTo5    | Places    | -34             | -61 | -17 | 1.60            | 0.75             | 116              |
| 1       | LTp3    | Places    | -14             | -33 | -11 | 0.99            | 0.86             | 122              |
| 3       | LTo4    | Places    | -29             | -54 | -8  | 1.32            | 0.69             | 80               |
| 3       | LTo5    | Places    | -30             | -54 | -8  | 1.23            | 1.05             | 86               |

|    |        |        |     |      |     |      |      |     |
|----|--------|--------|-----|------|-----|------|------|-----|
| 3  | LT03   | Places | -20 | -46  | -10 | 1.08 | 1.25 | 34  |
| 4  | RTp12  | Places | 53  | -47  | -4  | 1.62 | 0.84 | 120 |
| 4  | RO8    | Places | 31  | -94  | 4   | 1.57 | 1.18 | 96  |
| 4  | RO9    | Places | 36  | -90  | 7   | 1.42 | 1.70 | 106 |
| 4  | RFa11  | Places | 44  | 28   | 19  | 1.18 | 0.96 | 112 |
| 4  | RTp4   | Places | 11  | -56  | 10  | 0.31 | 0.81 | 400 |
| 5  | LT02   | Places | -18 | -37  | -13 | 0.52 | 0.69 | 134 |
| 8  | RT03   | Places | 28  | -45  | -10 | 1.63 | 1.12 | 80  |
| 8  | RP57   | Places | 22  | -65  | 61  | 0.83 | 0.76 | 124 |
| 8  | RP56   | Places | 22  | -64  | 59  | 0.50 | 0.63 | 116 |
| 9  | LTO6   | Places | -33 | -55  | -21 | 2.70 | 1.08 | 108 |
| 9  | LTO5   | Places | -29 | -54  | -18 | 2.36 | 1.19 | 110 |
| 9  | LTp6   | Places | -33 | -38  | -21 | 2.03 | 1.38 | 136 |
| 9  | LTp4   | Places | -22 | -36  | -15 | 0.67 | 1.54 | 164 |
| 9  | LTO4   | Places | -28 | -48  | -11 | 0.40 | 0.93 | 122 |
| 10 | RTp1   | Places | 14  | -29  | -13 | 1.48 | 1.21 | 96  |
| 10 | RFa11  | Places | 52  | 30   | 19  | 1.33 | 1.86 | 124 |
| 10 | RTp2   | Places | 24  | -38  | -13 | 0.66 | 0.77 | 138 |
| 10 | RFi1   | Places | 0   | 25   | -26 | 0.47 | 0.74 | 172 |
| 10 | RTi10  | Places | 60  | -42  | -12 | 0.45 | 0.57 | 172 |
| 10 | RTp3   | Places | 23  | -34  | -15 | 0.40 | 0.79 | 186 |
| 10 | LFm11  | Places | -48 | 41   | 27  | 0.35 | 0.64 | 214 |
| 2  | RO2    | V1     | 9   | -95  | -2  | 3.10 | 0.12 | 42  |
| 2  | RO3    | V1     | 11  | -94  | 1   | 2.97 | 0.08 | 44  |
| 2  | RO1    | V1     | 11  | -97  | -4  | 2.68 | 0.19 | 54  |
| 2  | RO4    | V1     | 11  | -94  | -1  | 2.07 | 0.12 | 68  |
| 6  | Grid44 | V1     | 12  | -98  | -4  | 0.75 | 0.44 | 124 |
| 6  | Grid42 | V1     | 8   | -92  | -4  | 0.66 | 0.42 | 120 |
| 6  | Grid43 | V1     | 11  | -91  | 8   | 0.61 | 0.35 | 144 |
| 6  | ROi4   | V1     | 4   | -85  | 9   | 0.37 | 0.17 | 154 |
| 8  | RO1    | V1     | 5   | -91  | 3   | 3.10 | 0.31 | 26  |
| 8  | RO3    | V1     | 10  | -81  | 8   | 2.23 | 0.33 | 12  |
| 8  | RO2    | V1     | 8   | -85  | 3   | 2.23 | 0.10 | 24  |
| 8  | RO4    | V1     | 9   | -77  | 11  | 1.70 | 0.06 | 38  |
| 1  | LT01   | V2     | -21 | -103 | -14 | 2.73 | 0.12 | 28  |
| 1  | LT02   | V2     | -14 | -93  | -19 | 1.26 | 0.41 | 48  |
| 1  | LT03   | V2     | -9  | -83  | -7  | 0.85 | 0.34 | 44  |
| 1  | LT04   | V2     | -17 | -77  | -13 | 0.50 | 1.11 | 72  |
| 2  | RO5    | V2     | 28  | -91  | 0   | 1.75 | 0.07 | 88  |
| 4  | RO2    | V2     | 7   | -78  | -11 | 3.05 | 0.13 | 50  |
| 4  | RT01   | V2     | 12  | -75  | -9  | 2.88 | 0.24 | 50  |
| 4  | RO1    | V2     | 8   | -77  | -12 | 2.58 | 0.27 | 44  |
| 4  | RT02   | V2     | -5  | -92  | 15  | 2.40 | 0.06 | 34  |
| 4  | RO3    | V2     | 12  | -75  | -7  | 2.30 | 0.07 | 40  |
| 4  | RO4    | V2     | 11  | -73  | -5  | 2.28 | 0.11 | 56  |

|           |        |           |     |      |     |                  |                  |               |
|-----------|--------|-----------|-----|------|-----|------------------|------------------|---------------|
| 4         | RO5    | V2        | 31  | -100 | 1   | 2.22             | 0.31             | 52            |
| 4         | RTo3   | V2        | -2  | -89  | 17  | 1.95             | 0.28             | 36            |
| 4         | RO6    | V2        | 30  | -99  | 2   | 1.88             | 0.06             | 62            |
| 4         | RO7    | V2        | 29  | -92  | 0   | 1.61             | 0.66             | 86            |
| 4         | RTo4   | V2        | 18  | -57  | -3  | 1.58             | 0.46             | 50            |
| 4         | RTo9   | V2        | 27  | -90  | 0   | 0.74             | 0.16             | 80            |
| 4         | RTo5   | V2        | 16  | -60  | -2  | 0.70             | 0.25             | 66            |
| 5         | Lo3    | V2        | -23 | -89  | -18 | 2.60             | 0.20             | 58            |
| 5         | Lo1    | V2        | -12 | -91  | -10 | 2.32             | 0.53             | 60            |
| 5         | Lo2    | V2        | -11 | -87  | -15 | 2.21             | 0.21             | 58            |
| 5         | Lo4    | V2        | -20 | -89  | -13 | 1.76             | 0.37             | 78            |
| 6         | Grid41 | V2        | 9   | -76  | -6  | 0.87             | 0.38             | 114           |
| 6         | ROs6   | V2        | 4   | -87  | 15  | 0.74             | 0.48             | 118           |
| 6         | Grid33 | V2        | 11  | -84  | -8  | 0.72             | 0.23             | 98            |
| 6         | Grid34 | V2        | 27  | -89  | -15 | 0.53             | 0.41             | 136           |
| 12        | LTm4   | V2        | -16 | -53  | -11 | 0.42             | 1.42             | 156           |
| 1         | LGRD51 | High Ret. | -51 | -80  | 8   | 1.93             | 0.19             | 74            |
| 1         | LGRD50 | High Ret. | -42 | -88  | 6   | 1.23             | 0.02             | 100           |
| 1         | LGRD49 | High Ret. | -37 | -87  | 4   | 0.73             | 0.01             | N/A           |
| 2         | RO6    | High Ret. | 29  | -92  | 4   | 1.43             | 0.15             | 90            |
| 2         | RTIp3  | High Ret. | 24  | -47  | -11 | 1.40             | 0.00             | 112           |
| 2         | RTo7   | High Ret. | 28  | -65  | 37  | 1.37             | 0.10             | 138           |
| 2         | RTIp4  | High Ret. | 27  | -51  | -8  | 1.35             | 0.22             | 122           |
| 2         | RO10   | High Ret. | 47  | -74  | 3   | 1.32             | 0.02             | 140           |
| 2         | RTIp5  | High Ret. | 30  | -52  | -8  | 1.27             | 0.14             | 134           |
| 2         | RO11   | High Ret. | 45  | -74  | 7   | 0.96             | 0.03             | 158           |
| 2         | RTo8   | High Ret. | 33  | -66  | 34  | 0.70             | 0.09             | 192           |
| 2         | RO12   | High Ret. | 41  | -72  | 9   | 0.63             | 0.30             | 140           |
| 5         | LP6    | High Ret. | -30 | -70  | 30  | 0.79             | 0.42             | 114           |
| 6         | Grid45 | High Ret. | 19  | -85  | 36  | 0.75             | 0.48             | 114           |
| 6         | Grid37 | High Ret. | 24  | -82  | 27  | 0.70             | 0.55             | 96            |
| 6         | Grid25 | High Ret. | 34  | -92  | -11 | 0.59             | 0.12             | 88            |
| 6         | Grid40 | High Ret. | 12  | -75  | 59  | 0.41             | 0.43             | 286           |
| 8         | RTo2   | High Ret. | 22  | -46  | -11 | 0.74             | 0.11             | 84            |
| Faces     |        |           |     |      |     | 0.71 (0.51-1.13) | 0.97 (0.75-1.56) | 132 (114-167) |
| Places    |        |           |     |      |     | 1.13 (0.5-1.54)  | 0.89 (0.75-1.18) | 121 (106-137) |
| V1/V2     |        |           |     |      |     | 1.88 (0.74-2.35) | 0.25 (0.12-0.39) | 58 (43-86)    |
| High Ret. |        |           |     |      |     | 0.87 (0.7-1.34)  | 0.12 (0.04-0.27) | 114 (95-139)  |

**Supplementary Table 2.** Details of visually responsive electrodes included in the analysis, showing the approximate MNI coordinates, visual response effect size (Choen's d; comparing post-stimulus HFB amplitude [100 to 500 ms post-stimulus] to a pre-stimulus baseline [-400 to -100 ms]), category selectivity effect size (Cohen's d; HFB response to faces vs. places in a time window of 100 to 500 ms post-stimulus), and response latency (see methods). At the bottom of the table we report median and interquartile range (Q1-Q3) for each electrode group.
